# Supplementary material for: Nanoscale MIL-101 supported RhNi nanoparticles: an efficient catalyst for hydrogen generation from hydrous hydrazine
Source: Royal Society of Chemistry journal article supplement (doi:10.1039/c5ta02201k), 2015-01-01

Electronic Supplementary Information

## Nanoscale MIL-101 supported RhNi nanoparticles: an efficient catalyst for hydrogen generation from hydrous hydrazine

Pingping Zhao,<sup>a</sup> Nan Cao,<sup>a</sup> Wei Luo,<sup>\*ab</sup> and Gongzhen Cheng<sup>a</sup>

<sup>a</sup> College of Chemistry and Molecular Sciences, Wuhan University, Wuhan, Hubei 430072, P. R. China. Tel.: +86 2768752366. *E-mail address*: wluo@whu.edu.cn.

<sup>b</sup> Suzhou Institute of Wuhan University, Suzhou, Jiangsu, 215123, P. R. China.

\* Corresponding author: wluo@whu.edu.cn.

Table S1. Characteristics of MOFs with different dimensions and Rh<sub>58</sub>Ni<sub>42</sub>@MIL-101.

| Sample                                     | wt%  | Surface Area (m <sup>2</sup> g <sup>-1</sup> ) | Pore volume (m <sup>3</sup> g <sup>-1</sup> ) | Pore size (nm) |
|--------------------------------------------|------|------------------------------------------------|-----------------------------------------------|----------------|
| MIL-101-50 nm                              |      | 3913.2                                         | 2.135                                         | 3.183          |
| MIL-101-100 nm                             |      | 3420.8                                         | 1.869                                         | 3.176          |
| MIL-101-200 nm                             |      | 2232.8                                         | 1.195                                         | 2.995          |
| Rh <sub>58</sub> Ni <sub>42</sub> @MIL-101 | 7.46 | 1538.2                                         | 0.922                                         | 1.178          |

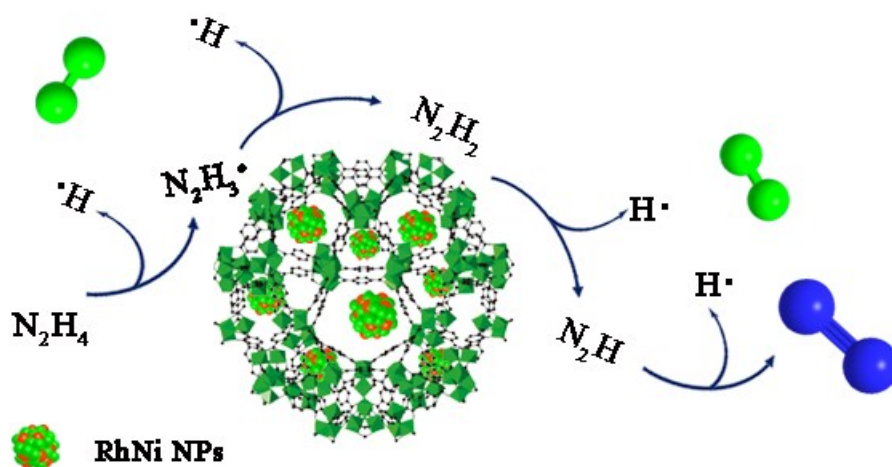

Scheme S1. The potential pathway of the catalytic mechanism.

Figure S1. Low-angle Powder X-ray diffraction patterns of MIL-101 with different dimensions: (a) 200 nm; (b) 100 nm; (c) 50 nm.

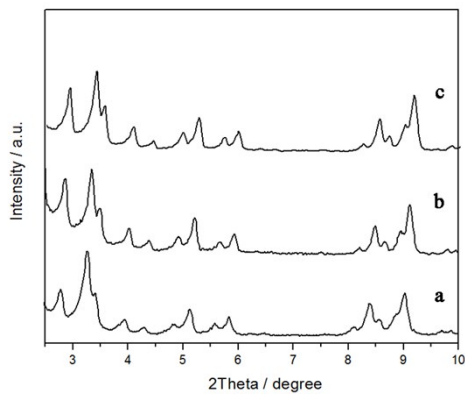

Figure S2. XPS spectra for catalyst  $\text{Rh}_{58}\text{Ni}_{42}\text{@MIL-101}$  (a) survey spectrum and (b)  $\text{Cr}^{2p}$ .

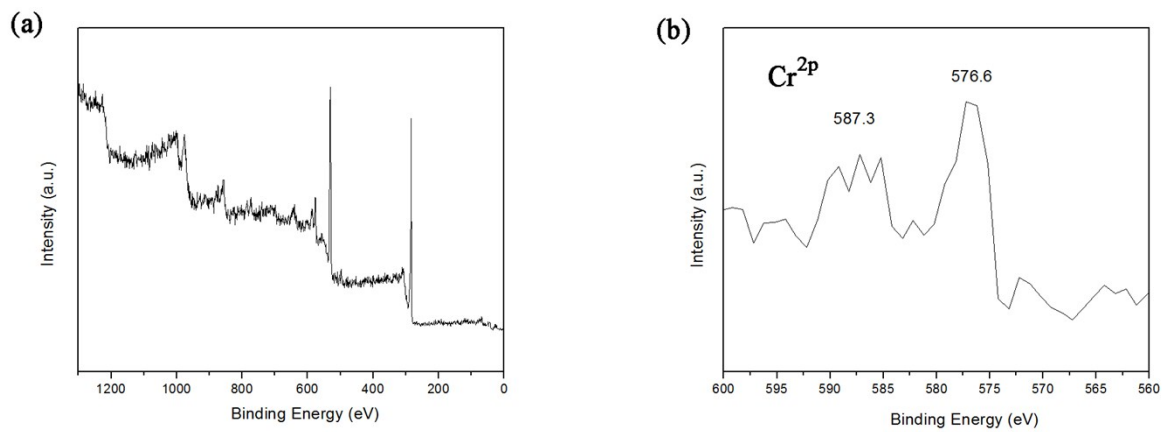

Figure S3. Magnetic effect test of the as-synthesized  $\text{Rh}_{58}\text{Ni}_{42}@\text{MIL-101}$  catalyst.

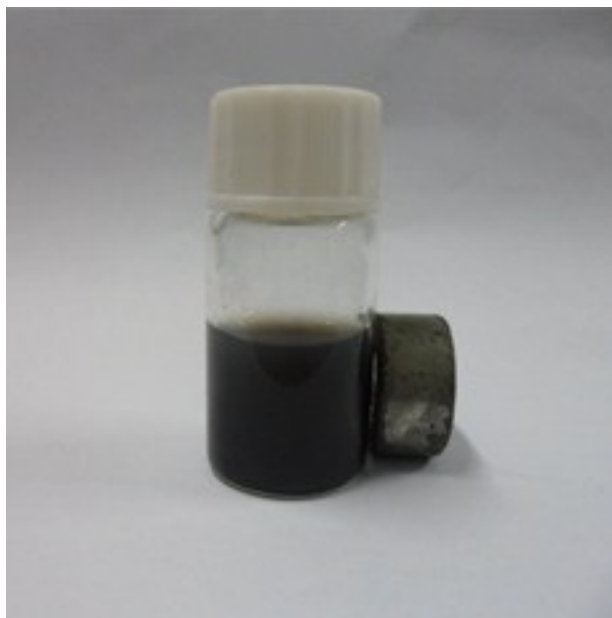

Figure S4. MS profile for the gases released from the decomposition reaction of hydrous hydrazine in aqueous NaOH solution (0.5 M) over  $\text{Rh}_{58}\text{Ni}_{42}@\text{MIL-101}$  (catalyst = 0.100 g;  $\text{N}_2\text{H}_4\cdot\text{H}_2\text{O}$  = 0.1 mL) at 50 °C.

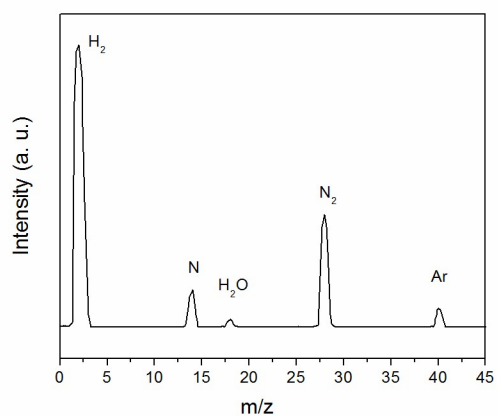

Figure S5. MS profile for the gases released from the decomposition reaction of hydrous hydrazine in aqueous NaOH solution (0.5 M) over RhNi/C (catalyst = 0.100 g;  $\text{N}_2\text{H}_4\cdot\text{H}_2\text{O}$  = 0.1 mL) at 50 °C.

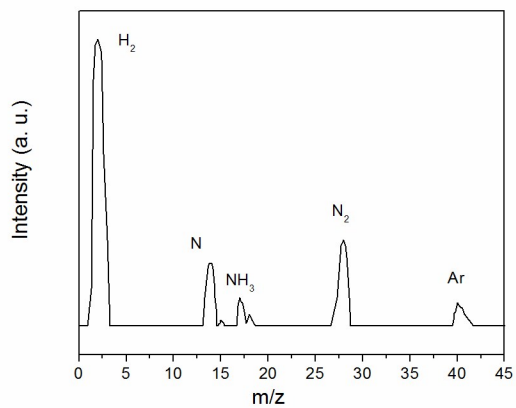

Figure S6. TEM of RhNi NPs with different dimensions.

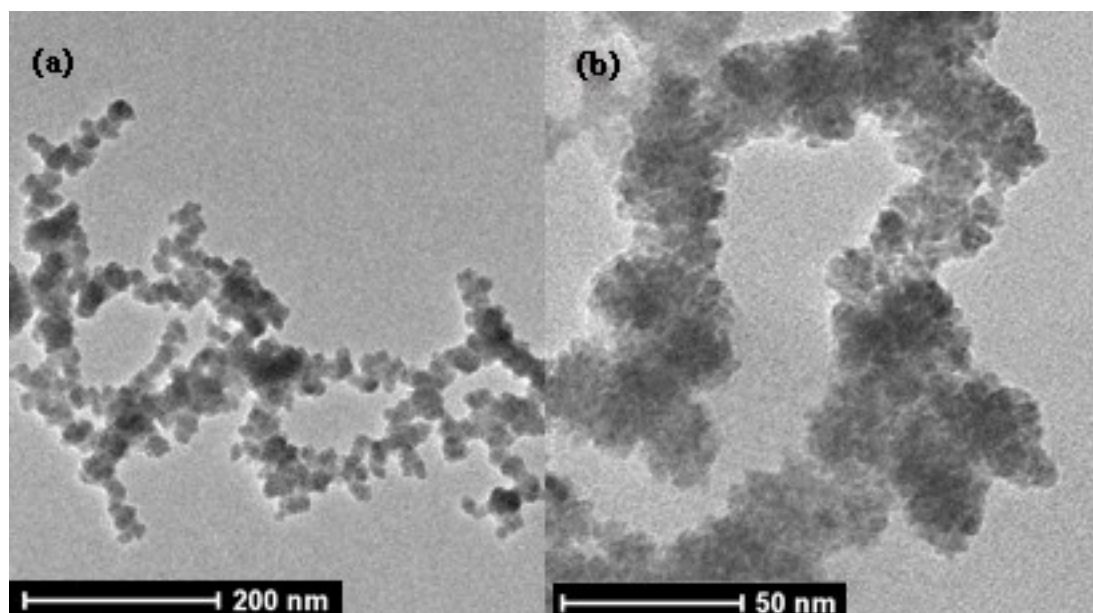

Figure S7. Rh<sub>58</sub>Ni<sub>42</sub>@MIL-101 catalyst after the canalization reaction of 5 runs toward the decomposition of hydrous hydrazine: (a) SEM; (b) TEM; (c) N<sub>2</sub> sorption isotherms; (d) low-angle powder X-ray diffraction pattern.

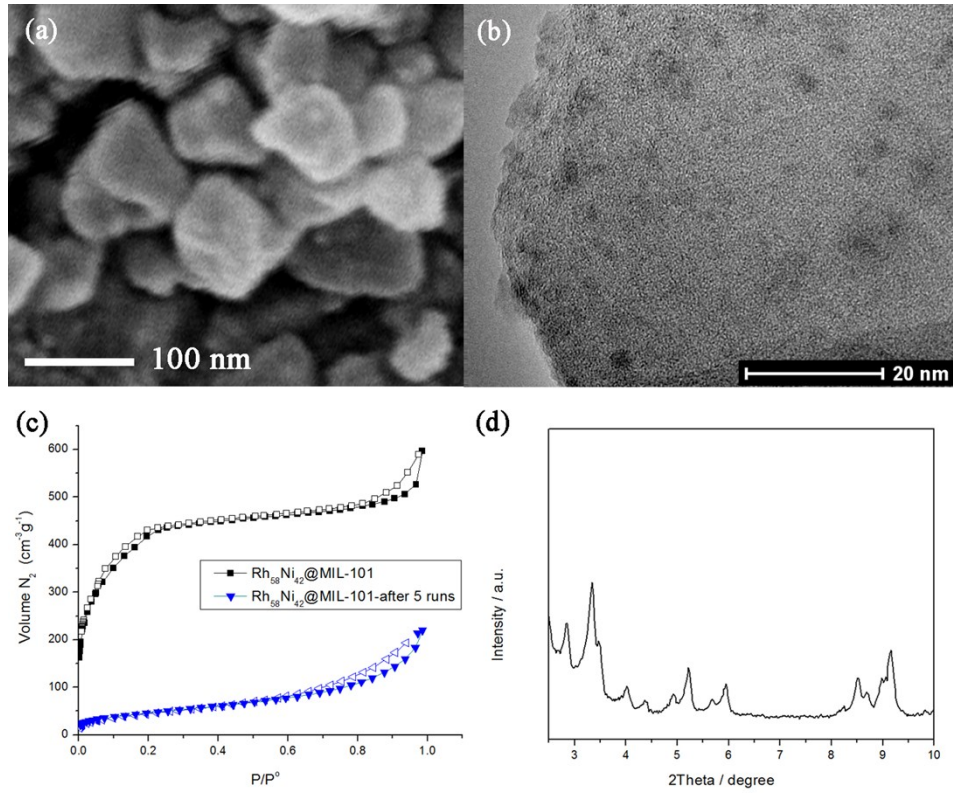

Supplement: c5ta02201k1.pdf [file c5ta02201k1.pdf]
